## Survival in adult inpatients with COVID-19

Efrén Murillo-Zamora<sup>a</sup>, Carlos Hernández-Suárez<sup>b,\*</sup>

<sup>a</sup>*Departamento de Epidemiología, Unidad de Medicina Familiar No. 19, Instituto Mexicano del Seguro Social, Av. Javier Mina 301, Col. Centro, CP 28000, Colima, Colima, México. Tel. +52(312) 3163770*

<sup>b</sup>*Facultad de Ciencias, Universidad de Colima, Bernal Díaz del Castillo 340, Col. Villas San Sebastián, CP 28045 Colima, Colima, México. Tel. +52(312) 3161135*

---

### Abstract

We conducted a nationwide and retrospective cohort study to assess the survival experience and determining factors in adult inpatients with laboratory-confirmed COVID-19. Data from 5,393 individuals were analyzed using the Kaplan-Meier method and a multivariate Cox proportional hazard regression model was fitted. The 7-day survival was 0.822 and went to 0.482, 0.280, and 0.145 on days 15, 21, and 30 of hospital stay, respectively. In the multiple analysis, factors associated with an increased risk of dying were: male gender, age, longer disease evolution before hospital entry, exposure to mechanical ventilator support, and personal history of chronic noncommunicable diseases (namely obesity, type-2 diabetes mellitus, and chronic kidney disease). To the best of our knowledge, this is the first study analyzing the survival probability in a large subset of Latin-American adults with COVID-19 and our results contribute to achieving a better understanding of disease evolution.

*Keywords:*

COVID-19; Inpatients; Cohort Studies; Survival; Proportional Hazards Models.

---

\*Corresponding author

*Email address:* [carlosmh@mac.com](mailto:carlosmh@mac.com) (Carlos Hernández-Suárez)

## Background

Worldwide, the coronavirus disease 2019 (COVID-19) by severe acute respiratory syndrome coronavirus 2 (SARS-COV-2) pandemic represents unprecedented health and social crisis. The clinical spectrum of SARS-COV-2 infection is wide and includes asymptomatic contagion, mild upper and unspecific respiratory tract symptoms, and severe viral pneumonia [1]. Most of COVID-19 cases have a good prognosis but a subset of patients develop a critical condition and even die [2].

On May 21, 2020, the observed COVID-19 mortality in Mexico has been high and over 6.5 thousand deaths were registered [3] and, among Latin-American countries, is only overcome by Brazil (nearly 18 thousand deaths) [4]. Published data regarding the clinical course of COVID-19 inpatients is scarce. The computed 14-day survival rate in a study that took place in the city of New York (U.S.), and where 2,773 inpatients were analyzed, was around 50% [5].

The evaluation of clinical outcomes in hospitalized patients with SARS-COV-2 infection may help clinicians and epidemiologists better appreciate the disease evolution, and lead to a more efficient allocation of healthcare resources [6]. This study aimed to assess the survival experience and associated factors in a large cohort of hospitalized adult inpatients with laboratory-confirmed COVID-19.

## Methods

### *Study design*

We conducted a nationwide and retrospective dynamic cohort study focusing on the survival of hospitalized adult patients with laboratory-confirmed (reverse transcription polymerase chain reaction, qRT-PCR) COVID-19. Eligible subjects were identified from the nominal records of a normative and web-based system for the epidemiological surveillance of viral respiratory diseases, which belongs to the Mexican Institute of Social Security (*IMSS*, the Spanish acronym).

30 *Population*

Individuals aged 18 years or above at acute illness onset and with conclusive evidence of COVID-19 by SARS-COV-2 were potentially eligible. Children and teenagers were not enrolled since current data suggest that severe illness is a rare event among them [7]. Subjects with hospital admission date later than  
35 May 5, 2020, were excluded, as well as those with missing clinical or epidemiological data of interest. A total of 341 inpatients were excluded (voluntary hospital discharge, 6.5%; aged under 18 years, 6.7%; referred to another health institution, 33.1%; missing information, 53.7%).

*Data collection*

40 Clinical and epidemiological data of interest were collected from the audited database and included demographic characteristics, illness severity (mild-moderate/severe) [8] at hospital admission, the personal history of chronic non-communicable diseases (no/yes; obesity, arterial hypertension, type 2 diabetes mellitus, asthma, chronic obstructive pulmonary disease, and chronic kidney  
45 disease). Dates from illness onset, hospital admission, and discharge (if applicable), as well as the exposure to invasive mechanical ventilation during stay (no/yes), were also obtained from the analyzed surveillance system. The analyzed variables are summarized in Table 1.

Medical files from the patients and death certificates represent the primary  
50 data source of the surveillance system which data base was employed.

*Outcome*

We analyzed the survival time of hospitalized COVID-19 adult patients measured as the time elapsed from the date of hospital entry (starting event) to the date of in-hospital death (final event). The censored variable was defined as the  
55 patients who did not present the interest event (did not die) during the follow-up period and the date of hospital discharge was used to compute the time-at risk.

### *Laboratory methods*

Nasopharyngeal and deep nasal swabs were collected from all analyzed patients in order to perform qRT-PCR (SuperScript™ III Platinum™ One-Step qRT-PCR Kits) analysis.

### *Statistical analysis*

Summary statistics were computed. The Kaplan–Meier method [9] was employed to estimate the probability of survival from the date of hospital entry. We fitted a Cox proportional hazard regression model to evaluate factors associated with the risk in-hospital death. The assumption of proportional hazard was verified by using a Schoenfeld residual-based test. All analyses were performed by using the Stata software (StataCorp. 2017. Stata Statistical Software: Release 15. College Station, TX: StataCorp LLC.).

### *Ethical considerations*

This study was approved by the Local Ethics in Health Research Committee (601) of the *IMSS* (R-2020-601-015).

## **Results**

Data from 5,393 participants (admitted to hospital in a period of 62 days from March 4, to May 5, 2020) were analyzed for a total follow-up of 48,568 person-days. The overall COVID-19 in-hospital lethality rate ( $n = 1,735$ ) was 35.7 per 1,000 person-days. The mean hospital stay ( $\pm$  standard deviation) was  $8.4 \pm 6.4$  vs.  $9.3 \pm 4.0$  days in cases with fatal and nonfatal outcome, respectively ( $p < 0.001$ ).

Table 1 shows the characteristics of participants for selected variables. Most of them were male (63.6%) and 3 out of 4 were aged 45 years or above at hospital admission. Severe illness at entry was documented in 80.5% of participants. In general and as is also shown in Table 1, enrolled patients had a high prevalence of analyzed chronic noncommunicable illnesses.

85 The Kaplan-Meier survival estimators are presented in Figure 1. A total of 153 deaths were registered within the first day of stay. The survival probabilities of COVID-19 adult inpatients at different periods (1, 3, 7, 15, 21, and 30 days) from hospital admission are summarized in Table 2. The 7-day survival rate was 0.808 (95% CI 0.791-0.824). After 2 weeks from admission, the survival was  
90 below 50% (0.482, 95% CI 0.450-0.513).

In the multiple model (Table 3), male gender (HR= 1.26, 95% Ci 1-14-1.40) and growing age were associated with an increased risk of in-hospital death. When compared with younger participants (18-29 years), subjects aged 45-59 and 60/above years old, had a 2-fold increase in the risk of dying (45-59  
95 years, HR= 1.99, 95% CI 1.31-3.02; 60 years or above, HR= 2.57, 95% CI 1.69-3.92). Subjects with longer waiting time between symptoms onset and hospital admission also had a lower survival probability ([reference:  $\leq$  1 day] 1-3 days, HR= 1.59, 95% CI 1.38-1.82;  $\geq$  4, HR= 1.68, 95% CI 1.51-1.87), as well as those with severe manifestations at entry (HR= 1.32, 95% 1.15-1.52).

100 COVID-19 inpatients requiring ventilatory mechanical support during the stay was also associated with the risk of dying (HR= 1.91, 95%, CI 1.70-2.15). High-risk comorbidities included obesity, type-2 diabetes mellitus, and chronic kidney disease (Table 3).

## Discussion

105 The results of this study describe the survival experience of hospitalized adults with COVID-19 and several factors associated with disease outcomes were evaluated. To the best of our knowledge, this is the first study evaluating illness outcomes in a large subset of Latin-American COVID-19 inpatients.

110 The related burden of SARS-COV-2 in Mexico has been high and obesity and chronic noncommunicable diseases (mainly type-2 diabetes mellitus), both of them showing epidemic characteristics in Mexican adults, may play a role in the observed scenario. Public policy focusing on the prevention of these illnesses has failed and growing trends have been documented [10, 11].

The prevalence of type-2 diabetes mellitus and arterial hypertension in our  
115 study sample was significantly higher than national means (diabetes, 31.1%  
vs. 10.3%,  $p < 0.001$ ; hypertension, 36.6% vs. 18.4%,  $p < 0.001$ ) [12]. These  
findings were secondary to the inclusion of cases requiring hospitalization; per-  
sonal history of chronic illness has been associated with a greater risk of severe  
COVID-19 manifestations and of hospital entry [13].

120 Gender-related differences have been documented in the severity of SARS-  
COV-2 symptomatic infection and diseases outcomes. In our study, a shorter  
survival was observed in males (log-rank test,  $p < 0.001$ ) and, for example,  
the Kaplan-Meier estimator after one week of hospitalization was 0.840 (95%  
0.823-0.856) and 0.810 (95% 0.797-0.824) in women and men, respectively. A  
125 protective role of estrogen signaling seems to be involved [14].

Elderly has been consistently associated with death risk among COVID-19  
patients and this association is independent from gender and other diseases  
which frequency also increases with age. In our study, the adjusted HR *per*  
*additional year of age* was 1.019 (95% CI 1.015-1.022). Factors determining the  
130 age-related risk have not been elucidated but recently published data suggest a  
role of angiotensin-converting enzyme 2 overexpression together with antibody-  
dependent enhancement [15].

In our study, longer waiting time between symptoms onset and admission  
was also associated with survival; participants with longer delay ( $\geq 4$  days), and  
135 when compared with those with recent symptoms ( $< 1$  day from disease onset to  
admission), had a 70% increase in the risk of dying (HR= 1.68, 95% 1.51-1.87).  
Similar findings were described in Hubei, China [16], however the mean elapsed  
days in our study sample was lower (3.1 vs. 5.7).

Patients requiring mechanical ventilator support during stay had a nearly  
140 2-fold (HR= 1.96, 95%, CI 1.75-2.21) in death risk. This seems to be an effect  
of the illness severity rather than a cause, since ventilator support was needed  
in 10.4% vs. 4.5% ( $p < 0.001$ ) of severe and mild-moderate cases, respectively.  
However, and despite the use of these mechanical devices, COVID-19 patients  
commonly complicate with organ failure or shock [17]. In addition, bacterial co-

145 infections related to invasive therapeutic procedures may play an undetermined  
role in disease outcomes [18].

The inclusion of only laboratory-positive cases, together with the large sam-  
ple size and national representativeness, are major strengths of this study. How-  
ever, potential limitations must be cited. First, we were unable to assess a gra-  
150 dient between body mass and survival functions, since anthropometric registers  
are not collected by the audited epidemiological surveillance system. Instead,  
obesity data is collected as a dichotomous variable. And second, no biomarkers  
data were available and which may have improved the accuracy of built models.  
Among others, a prognostic value of B-type natriuretic peptide and creatine  
155 kinase-MB has been documented recently [19].

## **Conclusion**

The COVID-19 pandemic-related mortality in Mexico has been high. The  
survival experience of hospitalized adults was documented in this nation-wide  
study and factors determining the illness outcome were assessed. Since obese  
160 and type 2 diabetes mellitus patients had a poor prognosis, our results highlight  
the major relevance of public health policies and interventions focusing on their  
prevention in the analyzed population.

## **Conflict of interest**

None to declare.

## 165 **Data Availability Statement**

The data that support the findings of this study are available on request from  
the corresponding author.

## References

- [1] F. Zhou, T. Yu, R. Du, G. Fan, Y. Liu, Z. Liu, J. Xiang, Y. Wang,  
170 B. Song, X. Gu, L. Guan, Y. Wei, H. Li, X. Wu, J. Xu, S. Tu, Y. Zhang,  
H. Chen, B. Cao, Clinical course and risk factors for mortality of adult inpa-  
tients with covid-19 in wuhan, china: a retrospective cohort study., *Lancet*  
(London, England) 395 (2020) 1054–1062. doi:10.1016/S0140-6736(20)  
30566-3.
- [2] C.-C. Lai, T.-P. Shih, W.-C. Ko, H.-J. Tang, P.-R. Hsueh, Severe acute  
175 respiratory syndrome coronavirus 2 (sars-cov-2) and coronavirus disease-  
2019 (covid-19): The epidemic and the challenges., *International journal*  
*of antimicrobial agents* 55 (2020) 105924. doi:10.1016/j.ijantimicag.  
2020.105924.
- [3] Dirección General de Epidemiología, Covid-19 en México: Información gen-  
180 eral, accessed on May 21, 2020 (2020).  
URL <https://coronavirus.gob.mx/datos>
- [4] World Health Organization, Coronavirus disease (COVID-19) dashboard,  
accessed on May 21, 2020 (2020).  
185 URL <https://covid19.who.int/>
- [5] I. Paranjpe, V. Fuster, A. Lala, A. Russak, B. S. Glicksberg, M. A. Levin,  
A. W. Charney, J. Narula, Z. A. Fayad, E. Bagiella, et al., Association of  
treatment dose anticoagulation with in-hospital survival among hospital-  
ized patients with covid-19, *Journal of the American College of Cardiology*  
190 (2020). doi:10.1016/j.jacc.2020.05.001.
- [6] W.-H. Liang, W.-J. Guan, C.-C. Li, Y.-M. Li, H.-R. Liang, Y. Zhao, X.-Q.  
Liu, L. Sang, R.-C. Chen, C.-L. Tang, T. Wang, W. Wang, Q.-H. He, Z.-S.  
Chen, S.-S. Wong, M. Zanin, J. Liu, X. Xu, J. Huang, J.-F. Li, L.-M. Ou,  
B. Cheng, S. Xiong, Z.-H. Xie, Z.-Y. Ni, Y. Hu, L. Liu, H. Shan, C.-L.  
195 Lei, Y.-X. Peng, L. Wei, Y. Liu, Y.-H. Hu, P. Peng, J.-M. Wang, J.-Y.



- Liu, Z. Chen, G. Li, Z.-J. Zheng, S.-Q. Qiu, J. Luo, C.-J. Ye, S.-Y. Zhu, L.-L. Cheng, F. Ye, S.-Y. Li, J.-P. Zheng, N.-F. Zhang, N.-S. Zhong, J.-X. He, Clinical characteristics and outcomes of hospitalised patients with covid-19 treated in hubei (epicenter) and outside hubei (non-epicenter):  
200 A nationwide analysis of china., *The European respiratory journal* (Apr. 2020). doi:10.1183/13993003.00562-2020.
- [7] J. F. Ludvigsson, Systematic review of covid-19 in children shows milder cases and a better prognosis than adults, *Acta Paediatrica* 109 (6) (2020) 1088–1095. doi:10.1111/apa.15270.
- 205 [8] M. Cascella, M. Rajnik, A. Cuomo, S. C. Dulebohn, R. Di Napoli, Features, evaluation and treatment coronavirus (covid-19), in: *Statpearls* [internet], StatPearls Publishing, 2020.
- [9] M. K. Goel, P. Khanna, J. Kishore, Understanding survival analysis: Kaplan-meier estimate, *International journal of Ayurveda research* 1 (4)  
210 (2010) 274. doi:10.4103/0974-7788.76794.
- [10] T. Shamah-Levy, M. Romero-Martínez, L. Cuevas-Nasu, I. Méndez Gómez-Humaran, M. Antonio Avila-Arcos, J. A. Rivera-Dommarco, The mexican national health and nutrition survey as a basis for public policy planning: Overweight and obesity, *Nutrients* 11 (8) (2019) 1727. doi:  
215 10.3390/nu11081727.
- [11] C. A. Dávila-Cervantes, M. Agudelo-Botero, Sex disparities in the epidemic of type 2 diabetes in mexico: national and state level results based on the global burden of disease study, 1990–2017, *Diabetes, metabolic syndrome and obesity: targets and therapy* 12 (2019) 1023. doi:10.2147/DMSO.  
220 S205198.
- [12] Secretaría de Salud, Instituto Nacional de Salud Pública, Instituto Nacional de Estadística y Geografía, Encuesta Nacional de Salud y Nutrición (ENSANUT) 2018: Presentación de resultados, accessed on May 21, 2020

(2019).

225 URL [https://ensanut.insp.mx/encuestas/ensanut2018/doctos/informes/ensanut\\_2018\\_presentacion\\_resultados.pdf](https://ensanut.insp.mx/encuestas/ensanut2018/doctos/informes/ensanut_2018_presentacion_resultados.pdf)

[13] R.-H. Du, L.-R. Liang, C.-Q. Yang, W. Wang, T.-Z. Cao, M. Li, G.-Y. Guo, J. Du, C.-L. Zheng, Q. Zhu, et al., Predictors of mortality for patients with covid-19 pneumonia caused by sars-cov-2: a prospective cohort study, *European Respiratory Journal* 55 (5) (2020). doi:10.1183/13993003.00524-2020.

[14] R. Channappanavar, C. Fett, M. Mack, P. P. Ten Eyck, D. K. Meyerholz, S. Perlman, Sex-based differences in susceptibility to severe acute respiratory syndrome coronavirus infection, *The Journal of Immunology* 198 (10) (2017) 4046–4053. doi:10.4049/jimmunol.1601896.

[15] J. Schatzmann Peron, H. Nakaya, Susceptibility of the elderly to sars-cov-2 infection: Ace-2 overexpression, Shedding and Antibody-dependent Enhancement (ADE) (2020). doi:10.6061/clinics/2020/e1912.

[16] W.-h. Liang, W.-j. Guan, C.-c. Li, Y.-m. Li, H.-r. Liang, Y. Zhao, X.-q. Liu, L. Sang, R.-c. Chen, C.-l. Tang, et al., Clinical characteristics and outcomes of hospitalised patients with covid-19 treated in hubei (epicenter) and outside hubei (non-epicenter): A nationwide analysis of china, *European Respiratory Journal* (2020). doi:10.1183/13993003.00562-2020.

[17] N. Chen, M. Zhou, X. Dong, J. Qu, F. Gong, Y. Han, Y. Qiu, J. Wang, Y. Liu, Y. Wei, et al., Epidemiological and clinical characteristics of 99 cases of 2019 novel coronavirus pneumonia in wuhan, china: a descriptive study, *The Lancet* 395 (10223) (2020) 507–513. doi:10.1016/S0140-6736(20)30211-7.

[18] M. J. Cox, N. Loman, D. Bogaert, J. O’grady, Co-infections: potentially lethal and unexplored in covid-19, *The Lancet Microbe* (2020). doi:10.1016/S2666-5247(20)30009-4.

- [19] M. Aboughdir, T. Kirwin, A. Abdul Khader, B. Wang, Prognostic value of cardiovascular biomarkers in covid-19: A review, *Viruses* 12 (5) (2020) 527. doi:10.3390/v12050527.

255 **Tables and Figures**

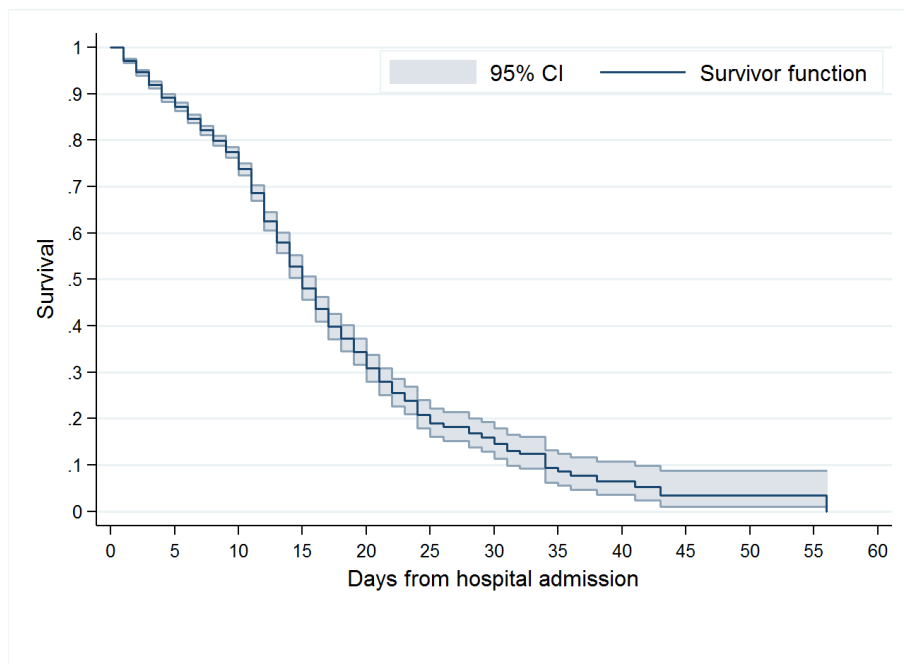

Figure 1: Survival estimators and 95% confidence intervals (CI) in 5,393 adult inpatients with laboratory-confirmed COVID-19, Mexico 2020

**Table 1.** Characteristics of study sample, Mexico 2020

|                                                    | <b>Died</b><br><i>n</i> = 1,735 | <b>Total</b><br><i>n</i> = 5,393 | <b>Follow-up</b><br>(person-days) |
|----------------------------------------------------|---------------------------------|----------------------------------|-----------------------------------|
| <b>Gender</b>                                      |                                 |                                  |                                   |
| Female                                             | 577 (33.3)                      | 1,961 (36.4)                     | 17,678                            |
| Male                                               | 1,158 (66.7)                    | 3,432 (63.6)                     | 30,890                            |
| <b>Age group (years)</b>                           |                                 |                                  |                                   |
| 18-29                                              | 23 (1.3)                        | 231 (4.3)                        | 1,744                             |
| 30-44                                              | 212 (12.2)                      | 1,113 (20.6)                     | 9,397                             |
| 45-59                                              | 651 (37.6)                      | 2,082 (38.6)                     | 18,999                            |
| 60 or more                                         | 849 (48.9)                      | 1,967 (36.5)                     | 18,428                            |
| <b>Days from symptoms onset to hospitalization</b> |                                 |                                  |                                   |
| <1                                                 | 681 (39.3)                      | 2,277 (45.2)                     | 23,421                            |
| 1 to 3                                             | 299 (17.2)                      | 909 (16.9)                       | 7,373                             |
| ≥ 4                                                | 755 (43.5)                      | 2,207 (40.9)                     | 17,774                            |
| <b>Disease severity</b>                            |                                 |                                  |                                   |
| Mild-moderate                                      | 234 (13.5)                      | 1,052 (19.5)                     | 9,451                             |
| Severe                                             | 1,501 (86.5)                    | 4,341 (80.5)                     | 39,117                            |
| <b>Invasive mechanical ventilation</b>             |                                 |                                  |                                   |
| No                                                 | 1,371 (79.0)                    | 4,895 (90.8)                     | 43,773                            |
| Yes                                                | 364 (21.0)                      | 498 (9.2)                        | 4,795                             |
| <b>Hospital stay (days)</b>                        |                                 |                                  |                                   |
| 3 or less                                          | 427 (24.6)                      | 639 (11.9)                       | 1,283                             |
| 4-6                                                | 372 (21.4)                      | 641 (11.9)                       | 3,215                             |
| 7-15                                               | 720 (41.5)                      | 3,691 (68.4)                     | 35,147                            |
| 16-30                                              | 201 (11.6)                      | 394 (7.3)                        | 7,917                             |
| 31 or more                                         | 15 (0.9)                        | 28 (0.5)                         | 1,006                             |
| <i>Personal history of:</i>                        |                                 |                                  |                                   |

**Table 1 continued from previous page**

**Table 1.** Characteristics of study sample, Mexico 2020

|                                   | <b>Died</b><br><i>n</i> = 1,735 | <b>Total</b><br><i>n</i> = 5,393 | <b>Follow-up</b><br>(person-days) |
|-----------------------------------|---------------------------------|----------------------------------|-----------------------------------|
| <b>Obesity (BMI 30 or higher)</b> |                                 |                                  |                                   |
| No                                | 1,277 (73.6)                    | 4,196 (77.8)                     | 37,757                            |
| Yes                               | 458 (26.4)                      | 1,197 (22.2)                     | 10,811                            |
| <b>Arterial hypertension</b>      |                                 |                                  |                                   |
| No                                | 927 (53.4)                      | 3,420 (63.4)                     | 31,099                            |
| Yes                               | 808 (45.6)                      | 1,973 (36.6)                     | 17,469                            |
| <b>Type-2 diabetes mellitus</b>   |                                 |                                  |                                   |
| No                                | 1,033 (59.5)                    | 3,716 (68.9)                     | 34,056                            |
| Yes                               | 702 (40.5)                      | 1,677 (31.1)                     | 14,512                            |
| <b>Asthma</b>                     |                                 |                                  |                                   |
| No                                | 1,690 (97.4)                    | 5,247 (97.3)                     | 47,263                            |
| Yes                               | 45 (2.6)                        | 146 (2.7)                        | 1,305                             |
| <b>COPD</b>                       |                                 |                                  |                                   |
| No                                | 1,612 (92.9)                    | 5,120 (94.9)                     | 46,072                            |
| Yes                               | 123 (7.1)                       | 273 (5.1)                        | 2,496                             |
| <b>Chronic kidney disease</b>     |                                 |                                  |                                   |
| No                                | 1,562 (90.0)                    | 5,094 (94.5)                     | 46,135                            |
| Yes                               | 173 (10.0)                      | 299 (5.5)                        | 2,433                             |

Abbreviations: **BMI**, body mass index; COPD, Chronic obstructive pulmonary disease

Note: The absolute and relative (%) frequencies are presented

**Table 2.** Kaplan Meier survival estimates in adult inpatients with COVID-19, Mexico 2020

| Day | Begin | Deaths | Survival | 95% CI        |
|-----|-------|--------|----------|---------------|
| 1   | 5,393 | 153    | 0.972    | (0.967-0.976) |
| 3   | 4,982 | 140    | 0.920    | (0.912-0.927) |
| 7   | 4,113 | 122    | 0.822    | (0.811-0.832) |
| 15  | 510   | 45     | 0.482    | (0.456-0.507) |
| 21  | 183   | 17     | 0.280    | (0.250-0.309) |
| 30  | 33    | 2      | 0.145    | (0.114-0.180) |

Abbreviations: **CI**, Confidence interval.

Table 3. Hazard ratio of dying in COVID-19 adult inpatients, Mexico 2020

|                                                        | HR (95% CI), <i>p</i> |             |          |                          |
|--------------------------------------------------------|-----------------------|-------------|----------|--------------------------|
|                                                        | Unadjusted            |             | Adjusted |                          |
| Male gender                                            | 1.14                  | (1.03-1.26) | 0.011    | 1.26 (1.14-1.39) < 0.001 |
| Age group, years (Ref. 18-29)                          |                       |             |          |                          |
| 30-44                                                  | 1.74                  | (1.13-2.67) | 0.012    | 1.47 (0.96-2.27) 0.079   |
| 45-59                                                  | 2.59                  | (1.71-3.93) | < 0.001  | 1.99 (1.31-3.02) 0.001   |
| 60 +                                                   | 3.48                  | (2.30-5.27) | < 0.001  | 2.57 (1.69-3.92) < 0.001 |
| Days from symptoms onset to hospitalization (Ref. < 1) |                       |             |          |                          |
| 1 to 3                                                 | 1.59                  | (1.39-1.83) | < 0.001  | 1.59 (1.38-1.82) < 0.001 |
| ≥ 4                                                    | 1.63                  | (1.47-1.81) | < 0.001  | 1.68 (1.51-1.87) < 0.001 |
| Illness severity at admission (Ref. Mild-moderate)     |                       |             |          |                          |
| Severe                                                 | 1.51                  | (1.31-1.73) | < 0.001  | 1.32 (1.15-1.52) < 0.001 |
| Invasive mechanical ventilation (yes)                  | 2.20                  | (1.95-2.47) | < 0.001  | 1.91 (1.70-2.15) < 0.001 |
| <i>Personal history of:</i>                            |                       |             |          |                          |
| Obesity (BMI 30 or higher), yes                        | 1.21                  | (1.09-1.35) | < 0.001  | 1.28 (1.15-1.43) < 0.001 |
| Arterial hypertension, yes                             | 1.56                  | (1.42-1.72) | < 0.001  | 1.10 (0.99-1.22) 0.086   |



**Table 2 continued from previous page**  
 Table 3. Hazard ratio of dying in COVID-19 adult inpatients, Mexico 2020

|                                      | <b>HR (95% CI), p</b> |                 |                          |
|--------------------------------------|-----------------------|-----------------|--------------------------|
|                                      | <b>Unadjusted</b>     | <b>Adjusted</b> | <b>Adjusted</b>          |
| <b>Type-2 diabetes mellitus, yes</b> | 1.67 (1.52-1.84)      | < 0.001         | 1.41 (1.27-1.56) < 0.001 |
| <b>Asthma, yes</b>                   | 0.95 (0.71-1.28)      | 0.741           | 0.92 (0.68-1.25) 0.601   |
| <b>COPD, yes</b>                     | 1.42 (1.18-1.70)      | < 0.001         | 1.11 (0.92-1.34) 0.276   |
| <b>Chronic kidney disease, yes</b>   | 2.16 (1.84-2.52)      | < 0.001         | 1.78 (1.51-2.09) < 0.001 |

Abbreviations: **COVID-19**, Coronavirus disease 2019; **HR**, Hazard ratio; **CI**, Confidence interval;

**Ref.**, Reference; **BMI**, Body mass index; **COPD**; Chronic pulmonary obstructive disease

Notes: 1) Cox proportional hazards regression models were used to compute HR and 95% CI;

2) Variables listed in the table were used to compute adjusted HR.
